# Supplementary material for: Impact of silver nanoparticles on the nutritional properties of Arthrospira platensis
Source: PeerJ. 2022 Oct 10;10:e13972. doi: 10.7717/peerj.13972 (PMC9563293; doi:10.7717/peerj.13972)
Supplement: Supplemental Information 1 [file peerj-10-13972-s001.xlsx]

## Sheet: Sheet1
biomass						protein						carbohydrate
SPSS	24h	48h	72h	96h		SPSS	24h	48h	72h	96h		SPSS	24h	48h	72h	96h
0	0	0	0	0		0	0	0	0	0		0	0	0	0	0
	0	0	0	0			0	0	0	0			0	0	0	0
	0	0	0	0			0	0	0	0			0	0	0	0
5	-0.58651	-1.55916	-3.9117	-6.89		5	-2.05966	-4.7767	-7.63	-21.8802		5	-1.88	-4.15	-7.52	-9.84
	-0.833333	-2.38906	-2.80584	-4.52			-1.85	-4.89139	-8.03	-24.7385			-1.51	-5.13	-7.2	-10.98
	-0.71	-1.97	-3.36	-6.16			-1.43	-5.75	-9.09	-23.18			-2.24	-4.64	-7.97	-8.22
10	-5.15	-4.61	-6.28177	-8.95		10	-4.11241	-7.8626	-16.72	-28.241		10	-3.74	-9.11	-20.6282	-12.3
	-2.93	-4.98	-5.12	-6.31091			-4.29	-6.45	-16.36	-25.5607			-4.12	-10.53	-17.86	-15.84
	-5.46	-5.98	-6.59914	-6.37342			-3.13	-6.83	-19.65	-29.7			-3.35	-9.82	-19.24	-14.07
25	-10.22	-19.7668	-16.907	-34.0572		25	-5.07	-9.96	-34.7249	-34.6632		25	-8.13	-10.54	-24.95	-31.22
	-12.7	-16.24	-19.4208	-29.4664			-5.8	-8.85	-30.21	-36.7396			-8.04	-13.46	-23.84	-29.42
	-11.46	-17.58	-18.4356	-35.8673			-5.71	-8.41	-31.29	-31.95			-8.09	-12	-22.72	-25.69
50	-18.7783	-27.2988	-31.8322	-54.065		50	-17.96	-21.39	-32.1614	-52.07		50	-19.3833	-18.22	-27.18	-34.25
	-17.03	-24.7375	-27.4595	-50.6881			-15.79	-20.9	-39.2435	-49.9994			-17.1123	-20.47	-27.94	-36.35
	-15.2915	-23.915	-27.9438	-47.6184			-15	-23.45	-35.7	-55.8766			-17.7507	-20.15	-24.34	-38.44
100	-35.5221	-48.4325	-55.325	-68.7971		100	-20.45	-38.02	-59.373	-63.7102		100	-25.01	-33.33	-38.31	-50.84
	-31.8908	-48.0629	-49.0233	-64.9601			-24.44	-37.3	-62.43	-66.3805			-23.3	-28.63	-39.42	-43.97
	-33.71	-41.02	-55.6225	-63.3686			-22.75	-34.29	-55.71	-71.5443			-26.69	-30.98	-40.77	-52.15
lipid						chlorphyll-a						carotenoid
SPSS	24h	48h	72h	96h		SPSS	24h	48h	72h	96h		SPSS	24h	48h	72h	96h
0	0	0	0	0		0	0	0	0	0		0	0	0	0	0
	0	0	0	0			0	0	0	0			0	0	0	0
	0	0	0	0			0	0	0	0			0	0	0	0
5	-2.67	-7.46	-13.7776	-15.1764		5	-2.07	-8.95	-11.23	-29.18		5	-9.65164	-13.5302	-21.9578	-29.1628
	-2.5	-7.15	-12.0349	-13.6098			-2.29	-9.81	-12.88	-27.68			-10.95	-14.2307	-22.9424	-27.9002
	-2.59	-8.14	-12.91	-14.39			-2.5	-6.72	-9.58	-29.04			-10.3	-13.88	-24.5013	-31.5203
10	-6.35	-8.46	-19.66	-22.34		10	-5.67	-15.68	-19.14	-37.69		10	-13.2484	-22.6012	-39.1277	-41.4474
	-6.17	-10.64	-22.35	-24.2207			-7.1	-12.25	-17.35	-37.7			-15.4296	-26.0312	-34.356	-45.3768
	-6.26	-9.55	-20.87	-20.46			-6.39	-13.43	-15.55	-38.91			-14.34	-23.78	-36.1212	-47.1966
25	-12.05	-17.7347	-25.4494	-42.76		25	-12.72	-22.68	-24.99	-48.25		25	-25.6406	-25.6584	-51.593	-65.1458
	-10.6721	-15.52	-27.9311	-44.8498			-11.66	-23.15	-26.13	-56.93			-29.6795	-30.9414	-51.39	-55.2841
	-11.32	-16.53	-27.39	-40.6745			-12.19	-22.92	-29.57	-56.25			-27.66	-28.3	-48.6416	-60.9608
50	-14.9734	-18.1992	-34.94	-58.2343		50	-19.92	-34.58	-34.78	-78.76		50	-31.1399	-39.018	-55.1722	-65.07
	-14.9187	-20.6296	-36.58	-53.6112			-16.56	-32.98	-32.05	-67.78			-34.7301	-36.6152	-58.4049	-67.26
	-14.95	-19.41	-30.06	-55.92			-18.24	-33.78	-39.9	-69.36			-32.93	-42.8087	-64.6359	-70.31
100	-27.8922	-41.73	-43.96	-57.2612		100	-31.98	-44.42	-56.1	-74.13		100	-10.5141	-14.1214	-23.6812	0
	-30.077	-41.66	-46.2802	-64.1973			-27.66	-39.49	-59.75	-85.97			-9.24725	-13.6261	-23.5341	0
	-28.98	-39.131	-41.64	-57.4082			-29.82	-41.96	-62	-88.88			-10.3198	-13.87	-20.1098	0
phycocyanin						total phenolic compound
SPSS	24h	48h	72h	96h		SPSS	24h	48h	72h	96h
0	0	0	0	0		0	0	0	0	0
	0	0	0	0			0	0	0	0
	0	0	0	0			0	0	0	0
5	-3.15662	-7.36	-9.83199	-23.5353		5	-2.7027	-6.06061	-12.5	-17.094
	-2.29361	-5.95157	-11.5167	-21.97			-1.88679	-6.89655	-12	-16.6667
	-2.73	-8.48	-10.67	-20.4048			-2.29	-6.48	-12.1212	-17.9487
10	-6.39543	-11.3148	-14.531	-27.4322		10	-10.8108	-18.1818	-21.0526	-25.641
	-6.73698	-11.0481	-15.3014	-29.8331			-13.2075	-17.2414	-18.75	-22.2222
	-6.57	-9.41	-15.3376	-27.2599			-12.01	-17.71	-22.7273	-25
25	-11.5701	-15.9994	-30.8757	-50.191		25	-13.3333	-27.5862	-29.1667	-38.4615
	-13.3254	-15.7206	-28.5505	-48.91			-16.2162	-22.79	-28	-41.0256
	-14.2199	-15.1312	-29.71	-47.6344			-14.77	-25.1	-28.58	-46.386
50	-17.3598	-23.8472	-38.3991	-68.9345		50	-20.7547	-27.2727	-48.3871	-52.9915
	-19.9448	-24.391	-34.7108	-62.9181			-20	-31.0345	-42.879	-58.3333
	-18.65	-20.3153	-32.0989	-65.7095			-20.38	-29.15	-42.4242	-62.963
100	-22.4561	-33.2695	-44.9956	-76.32		100	-27.027	-37.931	-50	-61.1111
	-26.1068	-30.482	-39.4916	-75.46			-26.4151	-33.3333	-58.0645	-66.6667
	-26.7248	-29.3154	-45.4851	-73.31			-26.72	-32.8457	-54.03	-62.5
